# Supplementary material
Source: MDPI journal article supplement (https://www.mdpi.com/1424-8247/15/9/1139)
Supplement: s1 [file s1]

## Supplement files

Table S1 Primer Sequence of genes

| Genes  | Primer Sequence |                                   |
|--------|-----------------|-----------------------------------|
| COPE   | FORWARD         | 5'- AGTTCGGTGTGGTCCTGGATGAG-3'    |
|        | REVERSE         | 5'-GTGGGCGAGGTAGTCAGCAAAC-3'      |
| ATF6   | FORWARD         | 5'-TGATGCCTTGGGAGTCAGACATTTG-3'   |
|        | REVERSE         | 5'-CGAGGAGACGAGACTGAATAACTTGAG-3' |
| IBTK   | FORWARD         | 5'-TATTCCACCGCCTTCCAGTTGTAATG-3'  |
|        | REVERSE         | 5'-CAACGCCAATGATTGTCCTTCCTTTC-3'  |
| PHLDB3 | FORWARD         | 5'-TCAAGACCTGGAGGAAGCGATGG-3'     |
|        | REVERSE         | 5'-GCCTGGAAGTAGATGACACCTTTGAG-3'  |
| P4HA1  | FORWARD         | 5'-CTAACGGCTGAGGACTGCTTTGAG-3'    |
|        | REVERSE         | 5'-CTCGCCTTCATCCAGTTGCCTTAG-3'    |
| GAPDH  | FORWARD         | 5'-GGA CCT CAT GGC CTA CAT GG-3'  |
|        | REVERSE         | 5'-TAG GGC CTC TCT TGC TCA GT-3'  |
